# Supplementary material for: Adrenergic modulation of focal adhesion kinase protects human ovarian cancer cells from anoikis
Source: JCI journal article supplement (doi:10.1172/jci40802), 2010-04-13

### Supplementary Figure Legends

**Supplementary Figure 1.** Effect of 10  $\mu$ M norepinephrine on FAK phosphorylation at the various tyrosine sites in the SKOV3ip1 cells.

**Supplementary Figure 2.** (a-b) Effect of 10  $\mu$ M norepinephrine on pFAK<sup>Y397</sup> over time.

**Supplementary Figure 3.** Western blot of lysate collected after transfection with FAK siRNA. Quantification of band intensity relative to actin intensity is shown below the Western blot.

**Supplementary Figure 4.** Effect of norepinephrine (10 $\mu$ M) in presence or absence of specific beta blockers.

**Supplementary Figure 5.** a) Western blot of lysate collected after transfection with either ADRB1 or ADRB2 siRNA. b) Effect of 10  $\mu$ M dobutamine in the presence of control or ADRB1 siRNA on PKA activity.

**Supplementary Figure 6.** Effect of 10  $\mu$ M norepinephrine on pFAK<sup>Y397</sup> in the presence or absence of  $\alpha$ 1 (prazosin) or  $\alpha$ 2 (yohimbine) antagonists in SKOV3ip1 (a) and EG (b) cells. In panels (a-b), the immunoblot is shown at the top and quantification of band intensity relative to total FAK intensity is shown below.

**Supplementary Figure 7.** Effect of 10  $\mu$ M norepinephrine on SKOV3ip1 anoikis with or without  $\alpha$ 1 (prazosin) or  $\alpha$ 2 (yohimbine) antagonists. Results represent the mean  $\pm$  s.e.m. \*p<0.01.

**Supplementary Figure 8.** Effect of 10  $\mu$ M norepinephrine on SKOV3ip1 anoikis in presence or absence of specific beta blockers. Results represent the mean  $\pm$  s.e.m. \*p<0.01.

**Supplementary Figure 9.** a) Effect of 10  $\mu$ M norepinephrine on anoikis in ADRB-negative A2780-Par and RMG-II cells. b) Effect of isoproterenol on anoikis following transfection of RMG-II cells with either ADRB2 (RMG-II-ADRB2) or empty vector (RMG-II-neo). Results represent the mean  $\pm$  s.e.m. \*p<0.05

**Supplementary Figure 10.** *In vitro* kinase assay with Src and either FAK or kinase-dead FAK (mutation at K454M). The kinase assay was also performed in the presence or absence of a Src inhibitor (AP23846).

**Supplementary Figure 11.** Effect of 10  $\mu$ M norepinephrine on FAK phosphorylation at the various tyrosine sites in the SYF-null fibroblasts.

**Supplementary Figure 12.** Western blot of lysate obtained from orthotopic SKOV3ip1 tumors harvested from mice with or without daily restraint stress.

**Supplementary Figure 13.** Western blot of tumors harvested from animals treated with either DOPC liposomes, control siRNA-DOPC, or FAK siRNA-DOPC. Quantification of band intensity relative to actin intensity is shown below the Western blot.

**Supplementary Figure 14.** Western blot of SKOV3ip1 tumors harvested from animals treated with either control siRNA-DOPC or Src siRNA-DOPC. Quantification of band intensity of pFAK<sup>Y397</sup> relative to actin intensity is shown below the Western blot.

**Supplementary Figure 15.** Kaplan-Meier curve of disease-specific mortality for patients with epithelial ovarian carcinoma based on pFAK<sup>Y397</sup> scores normalized to total FAK levels.

**Supplementary Figure 16.** Box-Plot of FAK and pFAK<sup>Y397</sup> scores based on CESD scores  $\geq 16$  or tumoral norepinephrine (NE) levels (greater *versus* less than median value of 0.84 pg/mg).

Supplementary Figure 1

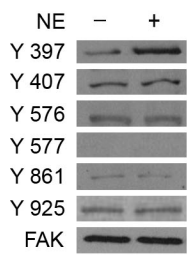

Supplementary Figure 2

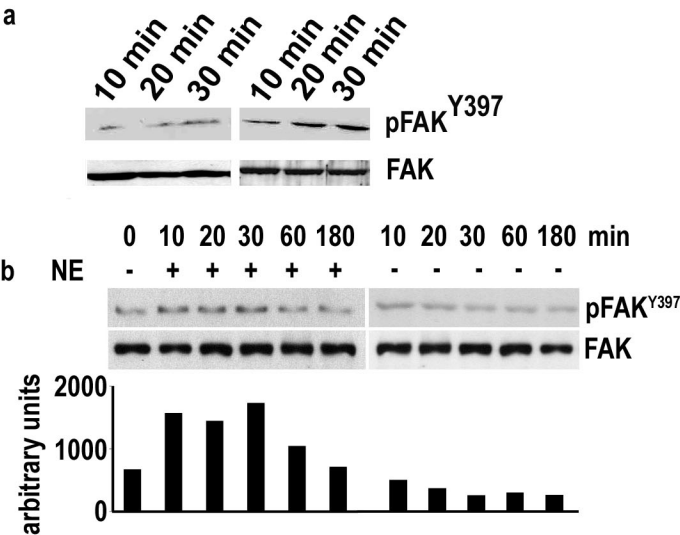

Supplementary Figure 3

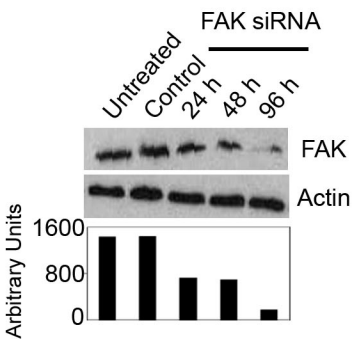

**Supplementary Figure 4**

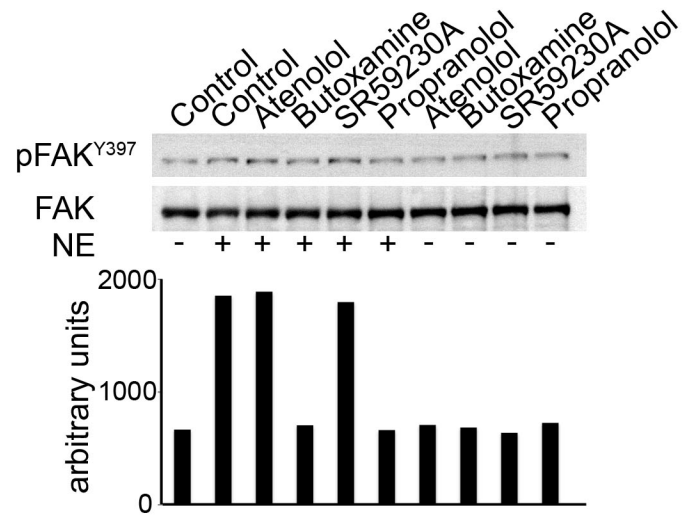

## Supplementary Figure 5

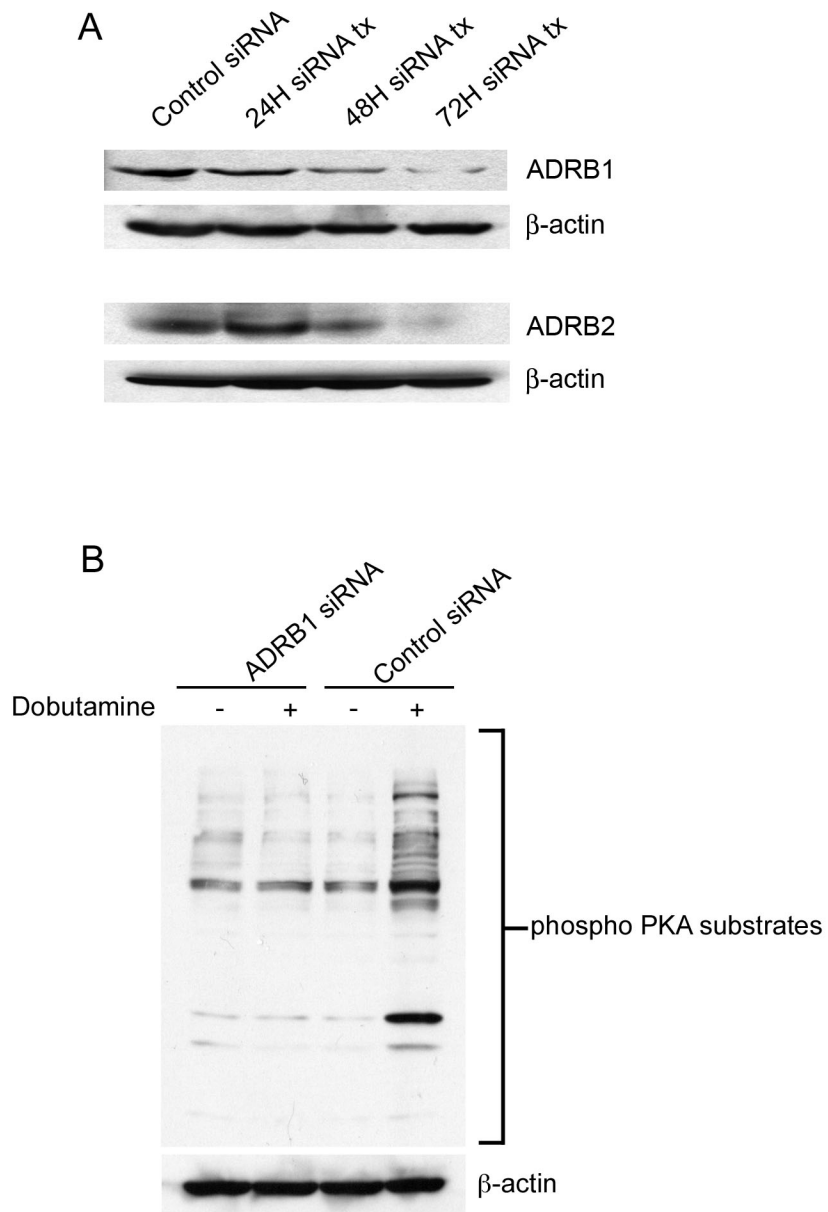

Supplementary Figure 6

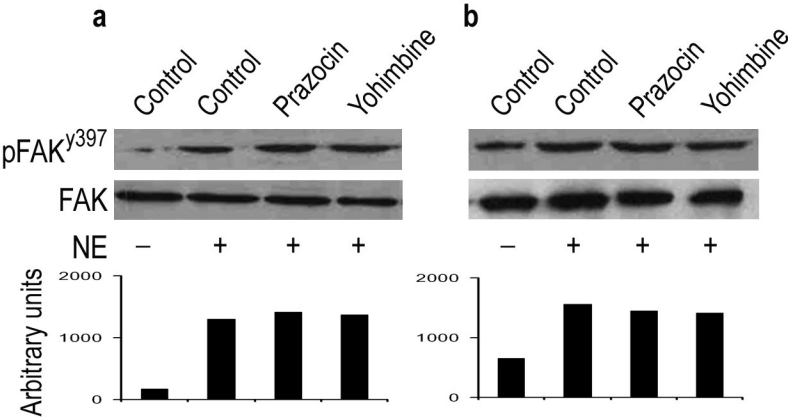



Supplementary Figure 7

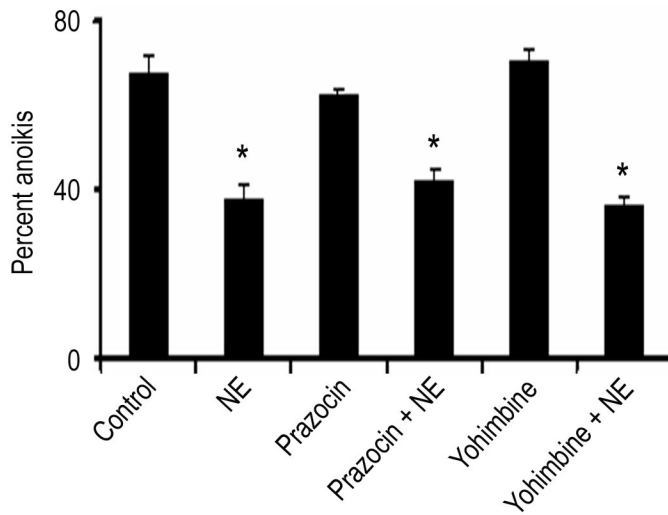

Supplementary Figure 8

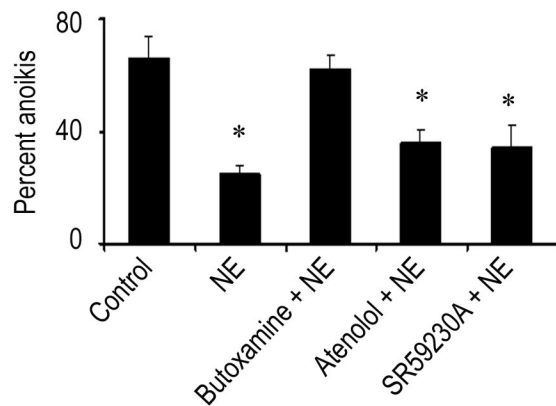

Supplementary Figure 9

a

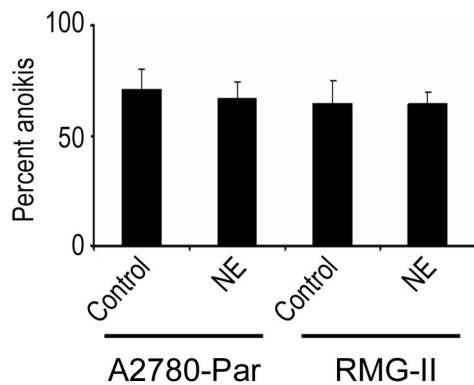

b

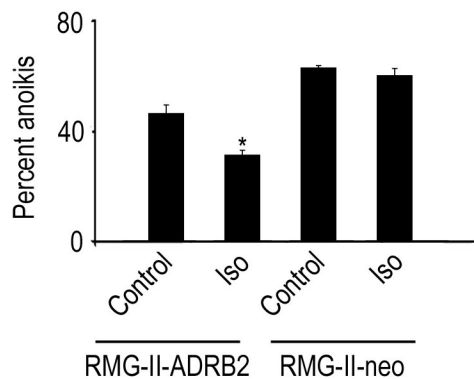

Supplementary Figure 10

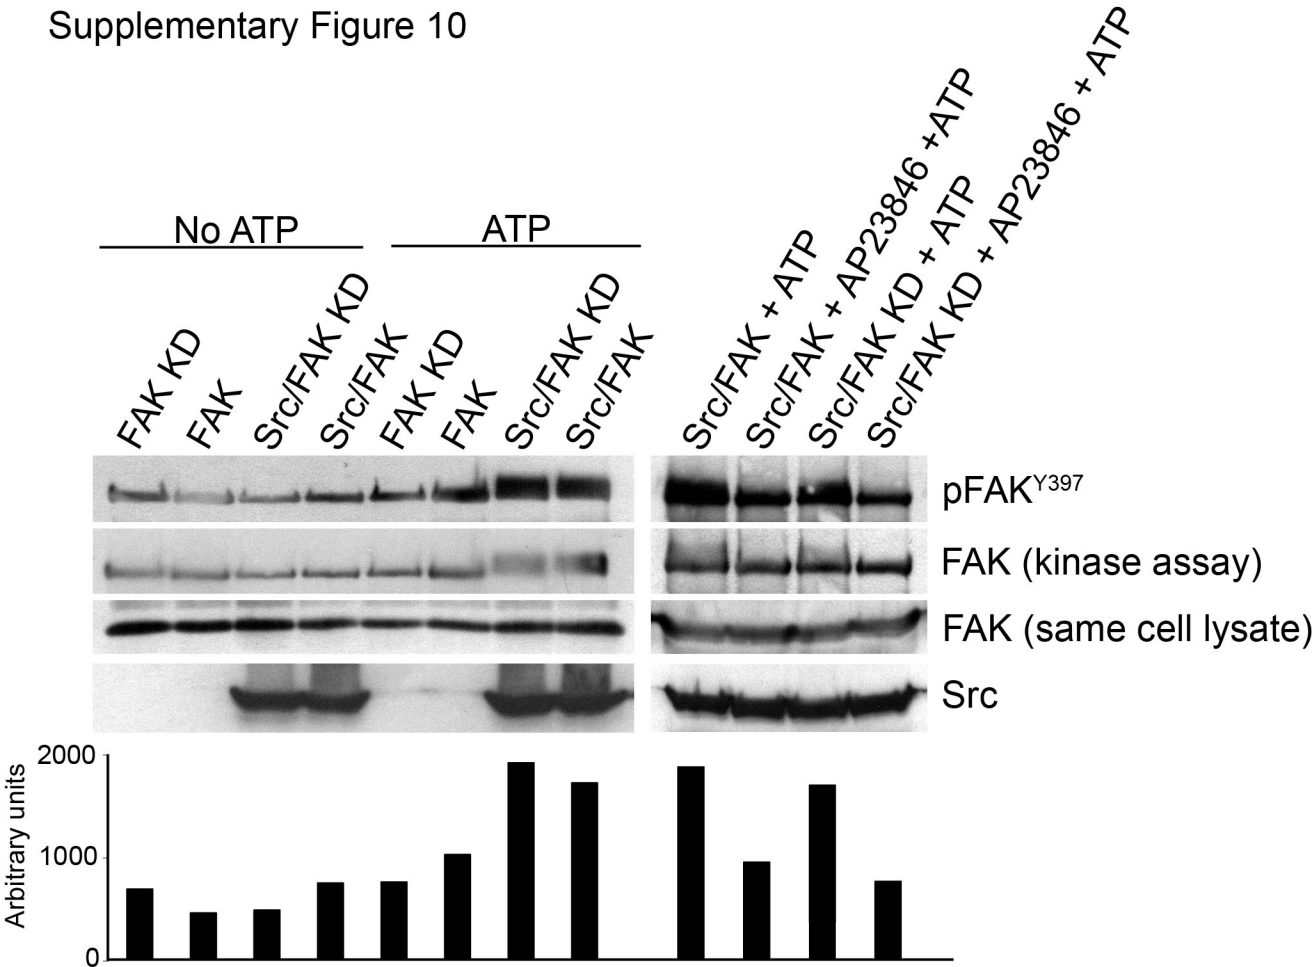

Supplementary Figure 11

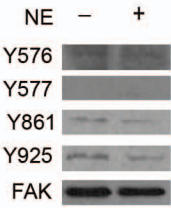

Supplementary Figure 12

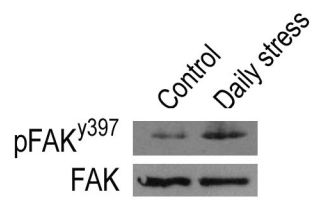

Supplementary Figure 13

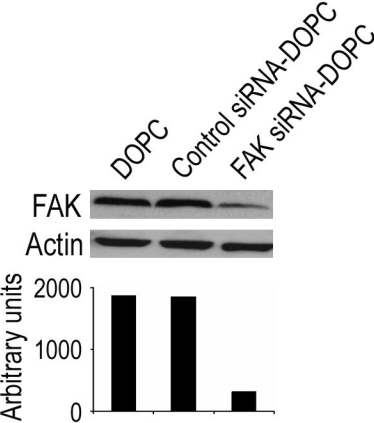

Supplementary Figure 14

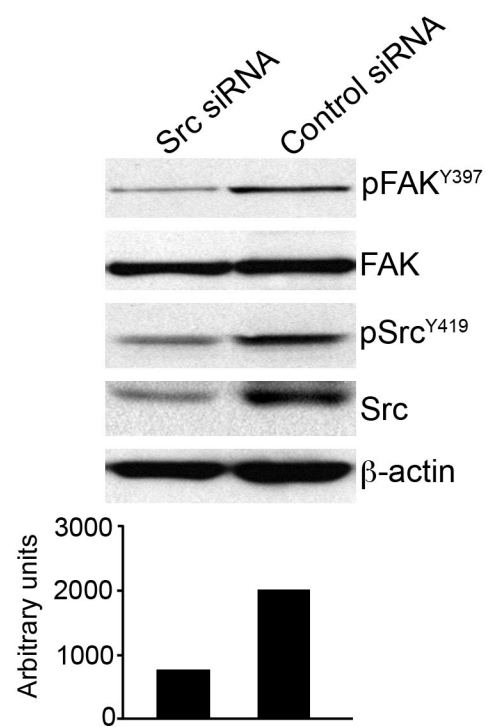



Supplemental Fig 15

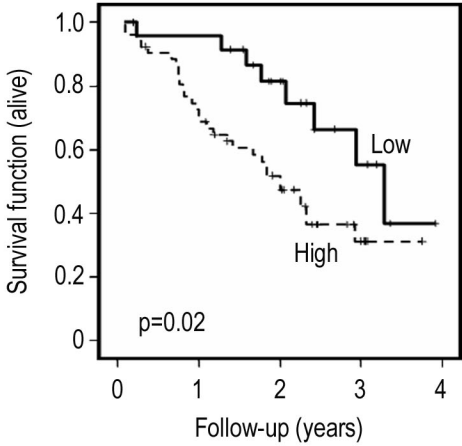

Supplemental Fig 16

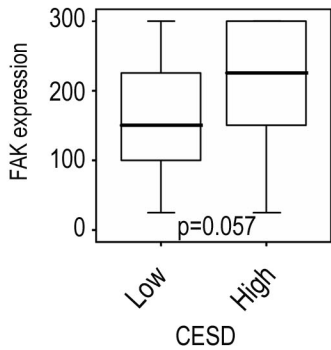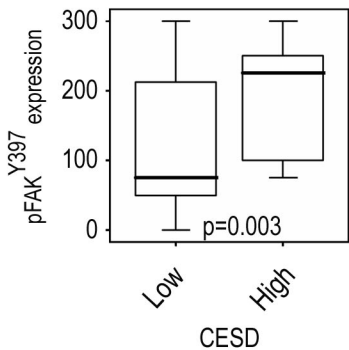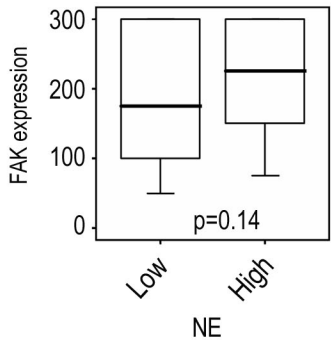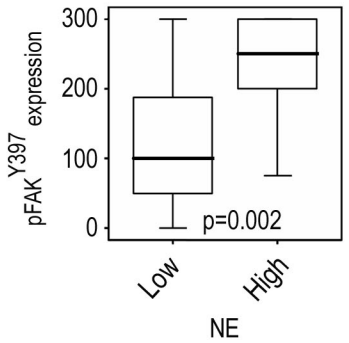

Supplement: sd1 [file 1]
